# Supplementary material for: Impact of Grapevine Red Blotch Disease on Cabernet Sauvignon and Merlot Wine Composition and Sensory Attributes
Source: MDPI journal article supplement (doi:10.3390/molecules25143299), 2020-07-21
Supplement: s1 [file s1]

## SUPPLEMENTAL DATA

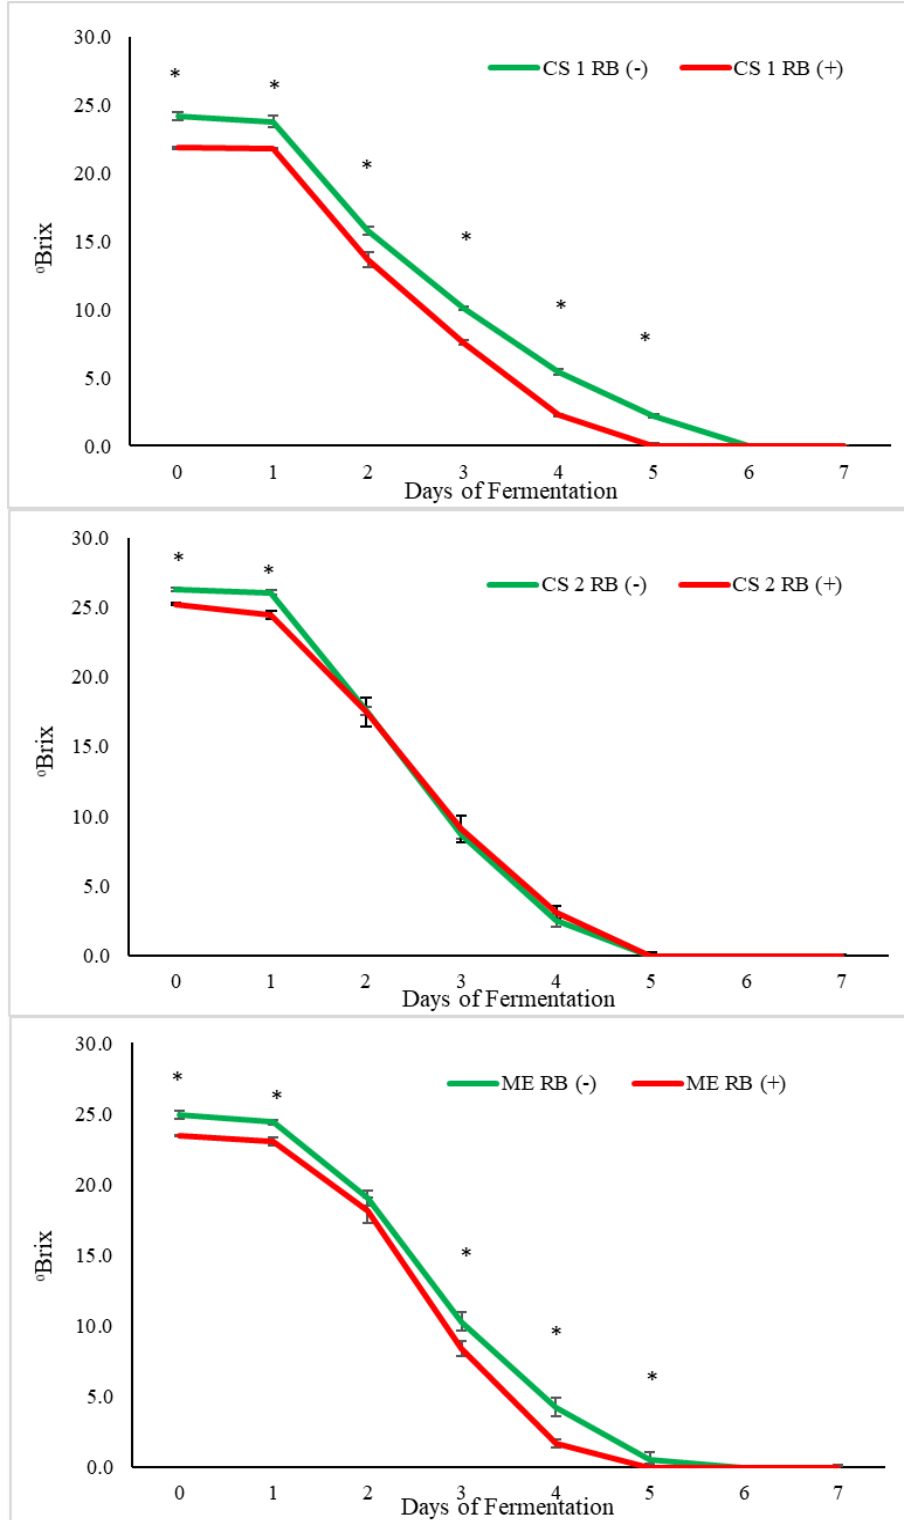

Supplemental Figure S1: Cabernet Sauvignon Site 1 (CS1), Cabernet Sauvignon Site 2 (CS2), and Merlot (ME) alcoholic fermentation profile of wines from 2014 season. Statistical differences are expressed asterisk (\*) and indicate significant differences in the ANOVA test ( $n=3$ ,  $P < 0.05$ ).

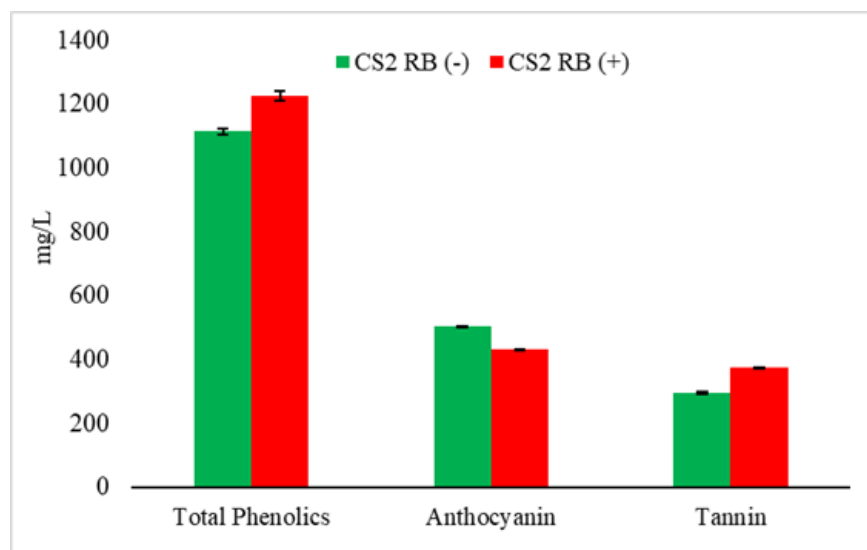

Supplemental Figure S2: Cabernet Sauvignon Site 2 (CS2) total phenolics, total anthocyanin, and total tannins concentration of 2015 wines (n=3)

Supplemental Table 1: Growing degree days (GDD) and precipitation (mm) accumulated, average air temperature maximum and minimum at Oakville Weather Station from April 1<sup>st</sup> to October 31<sup>st</sup> on the 2014 and 2015 seasons.

| <b>Station</b>           | <b>Data</b>              | <b>2014</b> | <b>2015</b> |
|--------------------------|--------------------------|-------------|-------------|
| Oakville Weather Station | GDD                      | 1886.77     | 2128.79     |
|                          | Air Temperature Min (°C) | 9.52        | 11.25       |
|                          | Air Temperature Max (°C) | 27.61       | 28.30       |
|                          | Precipitation (mm)       | 55.588      | 66.736      |

Supplemental Table S2: Descriptive analysis scores of RB (-) and RB (+) wines from 2014 and 2015.

| Attributes        | 2014          |               |               |               |               |               | Attributes        | 2015          |               |
|-------------------|---------------|---------------|---------------|---------------|---------------|---------------|-------------------|---------------|---------------|
|                   | CS1           | CS1           | CS2           | CS2           | ME            | ME            |                   | CS2           | CS2           |
|                   | RB (-)        | RB (+)        | RB (-)        | RB (+)        | RB (-)        | RB (+)        |                   | RB (-)        | RB (+)        |
| Red fruits        | 2.60 a        | 2.54 a        | 1.97 a        | 2.24 a        | 2.20 a        | 2.34 a        | Alcohol           | 4.29 a        | 3.94 a        |
| Dark fruits       | 3.16 a        | 3.17 a        | 3.30 a        | 3.46 a        | 3.28 a        | 3.44 a        | Acetone           | 3.23 a        | 2.55 b        |
| Dried fruits      | 2.35 a        | 2.13 a        | 2.76 a        | 2.76 a        | 2.33 a        | 2.58 a        | Eucalyptus        | 3.34 a        | 3.56 a        |
| Oxidized apple    | 1.26 a        | 1.16 a        | 1.11 a        | 1.24 a        | 1.13 a        | 1.13 a        | Green bell pepper | 2.65 a        | 2.30 a        |
| Jammy             | 1.50 a        | 1.78 a        | 1.79 a        | 1.59 a        | 1.73 a        | 1.69 a        | Pepper            | 2.98 a        | 2.94 a        |
| Green bell pepper | 0.46 a        | 0.51 a        | 0.69 a        | 0.84 a        | 0.65 a        | 0.62 a        | Tomato/thyme      | 2.09 a        | 1.82 a        |
| Leafy/ tobacco    | 1.53 a        | 1.35 a        | <b>1.44 a</b> | <b>1.09 b</b> | 1.39 a        | 1.54 a        | Chocolate/cocoa   | 1.45 a        | 1.37 a        |
| Cedar             | 1.44 a        | 1.21 a        | 1.52 a        | 1.48 a        | 1.56 a        | 1.49 a        | Soy               | 2.81 a        | 2.75 a        |
| Leathery/earthy   | 1.93 a        | 1.83 a        | 2.05 a        | 1.96 a        | 2.21 a        | 1.81 a        | Citrus            | 1.87 a        | 1.95 a        |
| Oaky              | 1.79 a        | 1.71 a        | 1.82 a        | 1.60 a        | 1.77 a        | 1.78 a        | Floral            | 2.24 a        | 2.75 a        |
| Alcohol           | <b>2.49 a</b> | <b>2.07 b</b> | 2.05 a        | 1.94 a        | 2.60 a        | 2.34 a        | Elderberry        | 3.77 a        | 4.29 a        |
| Solvent/ sulfur   | 1.19 a        | 1.12 a        | 1.07 a        | 0.93 a        | 1.11 a        | 1.08 a        | Stone fruit       | 3.40 a        | 3.50 a        |
| Baking spices     | 0.71 a        | 0.64 a        | 0.70 a        | 0.70 a        | 0.64 a        | 0.67 a        | Blackberry        | 3.56 a        | 4.00 a        |
| Black pepper      | 0.68 a        | 0.55 a        | 0.63 a        | 0.72 a        | 0.68 a        | 0.68 a        | Prune/dried       | 3.29 a        | 3.18 a        |
| Cacao/ chocolate  | 0.60 a        | 0.55 a        | <b>0.88 a</b> | <b>0.63 b</b> | 0.76 a        | 0.67 a        | Cherry            | 4.72 a        | 4.71 a        |
| Floral            | 1.02 a        | 1.17 a        | 0.96 a        | 1.03 a        | 0.91 a        | 0.99 a        | Oak               | 2.38 a        | 1.94 a        |
| Other             | 0.11 a        | 0.10 a        | 0.08 a        | 0.09 a        | 0.10 a        | 0.15 a        | Sour              | <b>3.46 b</b> | <b>4.28 a</b> |
| Sweet             | 2.23 a        | 2.42 a        | 2.75 a        | 2.60 a        | 2.14 a        | 1.94 a        | Sweet             | <b>3.70 a</b> | <b>2.87 b</b> |
| Sour              | 3.54 a        | 3.48 a        | 2.35 a        | 2.56 a        | 2.72 a        | 2.90 a        | Effervescent      | <b>3.59 a</b> | <b>2.93 b</b> |
| Salty             | 0.71 a        | 0.88 a        | 0.72 a        | 0.64 a        | <b>0.72 a</b> | <b>0.51 b</b> | Viscous           | 4.10 a        | 3.58 a        |
| Bitter            | 1.90 a        | 1.80 a        | <b>2.25 a</b> | <b>1.86 b</b> | 2.32 a        | 2.13 a        | Hot               | <b>5.69 a</b> | <b>4.43 b</b> |
| Coating           | <b>2.90 a</b> | <b>2.50 b</b> | 2.74 a        | 2.61 a        | 3.07 a        | 3.05 a        | Umami             | 2.21 a        | 2.07          |
| Viscous           | 2.85 a        | 2.85 a        | 3.08 a        | 2.99 a        | 3.18 a        | 2.93 a        | Bitter            | 3.35 a        | 3.03 a        |
| Astringent/ dry   | <b>3.32 a</b> | <b>2.73 b</b> | 2.73 a        | 2.90 a        | <b>3.54 b</b> | <b>4.13 a</b> | Coarseness        | 3.79 a        | 4.11 a        |
| Grippy            | 1.86 a        | 1.81 a        | 1.76 a        | 1.95 a        | 2.45 a        | 2.27 a        | Grippy            | <b>4.43 b</b> | <b>5.30 b</b> |
| Hot/ alcohol      | <b>2.65 a</b> | <b>2.22 b</b> | 2.85 a        | 2.63 a        | 2.93 a        | 2.74 a        | Drying            | 5.25 a        | 5.53 a        |

Means scores and least significant differences (LSD) for the descriptive analysis attributes rated in the wines using a rating scale from 0 (not present) to 10 (very intense). Means with same letter are not significantly different ( $p < 0.05$ ) comparing RB (-) and RB (+) wines within each site and year.
